# Supplementary material
Source: PubMed Central journal article supplement (PMC8325171)
Supplement: NIHMS1727417-supplement-1.pdf [file NIHMS1727417-supplement-1.pdf]

Supplementary Materials for

**VDAC oligomers form mitochondrial pores that release small mtDNA fragments and  
promote lupus-like disease**

Jeonghan Kim<sup>1</sup>, Rajeev Gupta<sup>2</sup>, Luz P. Blanco<sup>3</sup>, Shutong Yang<sup>1</sup>, Anna Shteinfer-Kuzmine<sup>2</sup>,  
Kening Wang<sup>4</sup>, Jun Zhu<sup>5</sup>, Hee Eun Yoon<sup>1</sup>, Xinghao Wang<sup>3</sup>, Kerkhofs Martijn<sup>6</sup>, Hyeog Kang<sup>1</sup>,  
Alexandra L. Brown<sup>1</sup>, Sung-Jun Park<sup>1</sup>, Xihui Xu<sup>1</sup>, Eddy Zandee van Rilland<sup>1#</sup>, Myung K. Kim<sup>1</sup>,  
Jeffrey I. Cohen<sup>4</sup>, Mariana J. Kaplan<sup>3</sup>, Varda Shoshan-Barmatz<sup>2</sup> and Jay H. Chung<sup>1\*</sup>

Corresponding author. Email: chungj@nhlbi.nih.gov

**This PDF file includes:**

Materials and Methods

Figs. S1 to S13

Table. S1

References

## Materials and Methods

### Cell culture and cellular component measurement

*Vdac1*<sup>3<sup>-/-</sup></sup> MEFs and *Bax/Bak*<sup>-/-</sup> MEFs with the respective WT littermate MEFs were obtained from Dr. Jeffery D. Molkentin (University of Cincinnati). WT, *Vdac1*<sup>-/-</sup> and *Vdac3*<sup>-/-</sup> MEFs were obtained from Dr. B. Geert (KU Leuven). WT and *Cgas*<sup>-/-</sup> MEFs were obtained from Dr. H. W. Virgin (Washington University School of Medicine). WT and *Irf3/Irf7*<sup>-/-</sup> MEFs were obtained from Dr. H. Lazear (The University of North Carolina at Chapel Hill). WT and *Micu1*<sup>-/-</sup> MEFs were obtained from Dr. T. Finkel (NIH/NHLBI). All MEFs were grown in complete Dulbecco's modified Eagle's medium (DMEM, Corning) supplemented with 10% fetal bovine serum (FBS, Sigma-Aldrich) and 1% penicillin and streptomycin antibiotics, (Gibco) at 37°C with 5% CO<sub>2</sub>. WT (p<sup>0</sup>) and *Endog*<sup>-/-</sup> (p<sup>0</sup>) MEFs were generated by incubation with ethidium bromide (Invitrogen) in complete DMEM supplemented with 15% FBS, antibiotics, uridine (50 µg/ml), and pyruvate (1 mM) for 5 months.

To generate MEFs with knockdown genes, MISSION shRNA Lentiviral Transduction Particles (Sigma-Aldrich) against mouse *Endog* (SHCLNV-NM\_007931) were purchased from Sigma-Aldrich and MEFs were transduced with the shRNA encoding lentivirus stocks in the presence of polybrene (8 µg/ml). Mouse *Cgas* (ON-TARGETplus *Mb21d1* siRNA: 214763), *Sting* (ON-TARGETplus *Tmem173* siRNA: 72512), *Tbkl* (ON-TARGETplus *Tbkl* siRNA: 56480), and control siRNA (ON-TARGETplus Non-targeting siRNA) were purchased from Dharmacon. The siRNA transfection of MEFs was performed with 50 nM siRNA and Lipofectamine RNAiMAX reagent (Invitrogen) according to the manufacturer's instructions. The expression vector for ΔN-VDAC1 was generated by PCR using the primers shown in Table. S1A. The expression vector for 3A VDAC1 was generated by the QuikChange Site-Directed Mutagenesis Kit (Stratagene) with the appropriate primers (Table. S1A). After transiently transfecting the expression vectors for WT,

ΔN- and 3A VDAC1 into *Vdac1*<sup>3<sup>-</sup></sup> MEFs, the ISG expression levels were measured and normalized to overexpressed *Vdac1* mRNA levels.

Cellular cGAMP levels were measured by LC/MS (Agilent Technologies) using 5% perchloric acid extracts of WT and *Endog*<sup>-/-</sup> MEFs. Intracellular ROS production in MEFs was measured using the oxidative stress indicator CM-H<sub>2</sub>DCFDA (Invitrogen) with flow cytometry (BD Biosciences). The results of flow cytometry were analyzed using BD FACSDiva™ Software (BD Biosciences). Mitochondrial ROS in MEFs were evaluated using the mitochondrial superoxide indicator MitoSOX (Invitrogen) with a confocal microscope (LSM880, Zeiss) equipped with a 63×/1.4 Plan-Apochromat lens (Zeiss). The confocal images were processed using ZEN Imaging Software (Zeiss). To quantify mitochondrial ROS in human PBMCs, the cells were obtained from heparinized blood using a Ficoll-Paque gradient. The cells were washed with phosphate-buffered saline (PBS), resuspended in RPMI 1640 medium, and transferred to 96-well plates. Subsequently, the cells were stimulated with the calcium ionophore A23187 (2.5 μM), VBIT-4 (5 μM), and MitoSOX (10 μM) (Life Technologies) for 1 h. To determine the number of cells per well, PicoGreen dye (100 pg/ml) was added to duplicate wells and the fluorescence (Em/Ex 480/520) was measured at initiation of the experiment. After 30 min at 37°C, the fluorescence was measured at 510/595 nm using a microplate reader (Synergy HTX; BIOTEK). Cells without dye were used as the blank control. To perform cell type analysis of mitochondrial ROS by VBIT-4, isolated PBMCs were stained for CD14<sup>lo</sup> (#325610, Biolegend), CD15<sup>hi</sup> (#301920, Biolegend) low-density granulocytes (LDG); CD14<sup>hi</sup>, CD15<sup>lo</sup> Monocyte; CD3<sup>+</sup> (#300317, Biolegend), CD19<sup>-</sup> (#302232, Biolegend) T cell; CD3<sup>-</sup>, CD19<sup>+</sup> B cell; CD3<sup>-</sup>, CD56<sup>+</sup> (#362504, Biolegend) natural killer cell (NK cell). Cells were washed with PBS twice and pre-treated with VBIT-4 (5 μM) for 10 min before A23187 (2.5 μM) and then incubated with MitoSOX

(10  $\mu$ M) for 30 min. Cells were washed with PBS and resuspended cells were analyzed using flow cytometry (Fortessa).

## RNA sequencing and bioinformatic analyses

Total cellular RNA was extracted from WT and *Endog*<sup>-/-</sup> MEFs using the RNeasy Plus RNA extraction kit (QIAGEN) and RNA integrity was verified by an Agilent Bioanalyzer. RNA sequencing was performed in the NIH DNA Sequencing and Genomics core. RNA integrity was first verified by an Agilent Bioanalyzer. Starting from 500 ng of total RNA, the TruSeq stranded total RNA library preparation kit (Illumina) was used to construct RNAseq libraries following the manufacturer's instructions. The resulting libraries were quantified by QuBit fluorometer (Thermo Fisher) and sequenced on a Hiseq-3000 using a 2 $\times$ 50 bp modality. Data analysis of RNA sequencing results was performed in the NIH-Bioinformatics and Computational Biology Core Facility. Rigorous quality controls of paired-end reads were assessed using FastQC tools. Gene expression levels were estimated for the GENCODE GTF reference database. Cohort gene expression data was then assessed for outliers and irregular characteristics by reviewing properties of summary distributions by unsupervised principle component analysis (PCA) using R and manual review of the outcome. Differential expression analysis at the gene-level was carried out using limma open source R/Bioconductor packages. The lmFit function in limma was used to Fit linear models for each gene to calculate log2-fold changes and p-values using the normalized factors as weights in the model. To account for multiple testing, the false discovery rate (FDR) via the Benjamani–Hochberg algorithm was calculated. FDR q-values were estimated to correct the p-values for the multiple testing issue.

## RNA extraction and reverse-transcription quantitative PCR (RT-qPCR)

Total RNA was extracted using the RNeasy Plus Mini Kit (Qiagen) according to the manufacturer's instructions. The first-strand cDNA was synthesized from 2 µg purified mRNA using Accupower RT PreMix (BioNeer). The reaction mixtures were incubated at 42°C for 60 min and 94°C for 5 min. RT-qPCR was performed using the LightCycler 96 system (Roche Life Science) with SYBR Green master mix (Roche) and related primers (Table. S1B). GAPDH was used as an internal standard of mRNA expression, and the ratio of the target gene expression to GAPDH expression was calculated using LightCycler 96 Instrument software (Roche). The quality of RT-qPCR results was evaluated based on the melting temperature ( $T_m$ ) of a DNA fragment and melting curve analysis.

#### Cell lysate preparation and immunoblot analysis

MEFs were harvested and washed twice with ice-cold PBS, and the pellets were lysed on ice for 30 min in RIPA buffer. (50 mM Tris-HCl pH 7.4, 0.15 M NaCl, 1 mM EDTA, 1% NP-40, and 0.25% sodium deoxycholate) freshly supplemented with PhosSTOP phosphatase inhibitors (Roche) and cOmplete™ protease inhibitors (Roche). Nuclear extracts were obtained using the NE-PER Nuclear and Cytoplasmic Kit (Pierce) according to the manufacturer's instructions. The total protein concentration was determined by Coomassie Plus protein assay (Thermo Fisher) and subjected to immunoblotting. The following primary antibodies were used (1:1,000 dilution). VDAC1 (ab14734, abcam); VDAC2 (#9412, Cell Signaling); VDAC3 (55060, Protein tech); ENDOG (ab76122, abcam); IRF3 (#4302, Cell Signaling); phospho-IRF3 (#79945, Cell Signaling); phospho-TBK1 (#5483, Cell Signaling); p-STAT1 (#9167, Cell Signaling); lamin B1 (#13435, Cell Signaling); ISG15 (#2743, Cell Signaling); IFI44 (MBS2528890, MyBioSource); BAK (#12105, Cell signaling); BAX (#2772, Cell signaling); Caspase 3 (#14220, Cell signaling); V5-Tag (#13202, Cell signaling);  $\alpha$ -tubulin (sc-8035, Santa Cruz).

### Quantification of mtDNA release

MEFs ( $2 \times 10^6$  cells) were resuspended in 170  $\mu$ l of digitonin buffer containing 150 mM NaCl, 50 mM HEPES pH 7.4, and 25  $\mu$ g/ml digitonin (EMD Millipore Corp). The homogenates were incubated on a rotator for 10 min at room temperature, followed by centrifugation at  $16,000 \times g$  for 25 min at  $4^\circ\text{C}$ . A 1:20 dilution of the supernatant (cmtDNA) was used for qPCR. The pellet was resuspended in 340  $\mu$ l of lysis buffer containing 5 mM EDTA and proteinase K (Qiagen) and incubated at  $55^\circ\text{C}$  overnight. The digested pellet was diluted with water (1:20 to 1:100) and heated at  $95^\circ\text{C}$  for 20 min to inactivate proteinase K, and the sample was used for qPCR with mtDNA specific primers (Table. S1C). The cmtDNA in the supernatant was normalized to the total mtDNA in the pellet for each sample. For the quantification of fimtDNA release, MEFs were resuspended in mitochondrial isolation buffer and subsequently homogenized 30 times with pestle B (small clearance). The homogenized samples were centrifuged at  $1,000 \times g$  for 10 min at  $4^\circ\text{C}$ . The supernatant was transferred to a new tube and centrifuged at  $1,000 \times g$  for 5 min at  $4^\circ\text{C}$ , and the mitochondrial pellet was collected after the centrifugation of the final supernatant at  $11,500 \times g$  for 10 min at  $4^\circ\text{C}$ . Isolated mitochondria were resuspended in 50  $\mu$ l of CSK buffer containing 10 mM PIPES pH 6.8, 300 mM sucrose, 100 mM NaCl, 3 mM  $\text{MgCl}_2$ , 1 mM EGTA, and 0.05% Triton X-100 for 5 min on ice. The supernatant (fimtDNA) and CSK-pellet fractions were collected after centrifugation at  $17,000 \times g$  for 30 min at  $4^\circ\text{C}$ . A 1:20 dilution of CSK-sup was used for qPCR with D-loop primers (Table. S1C). CSK-pellets were resuspended in 100  $\mu$ l lysis buffer containing 5 mM EDTA and proteinase K and incubated at  $56^\circ\text{C}$  overnight. The digested pellet was diluted with water (1:20 to 1:100) and heated at  $95^\circ\text{C}$  for 20 min, and the CSK-pellet fraction was used for qPCR in each reaction. The fimtDNA in CSK-sup was normalized to the mtDNA in the CSK-pellet.

## Mitoplast isolation

Mitoplasts were isolated from the mitochondria of mouse liver. The liver tissue was washed twice with ice-cold PBS and minced in mitochondrial isolation buffer containing 225 mM mannitol, 75 mM sucrose, 5 mM MOPS, 0.5 mM EGTA, and 2 mM taurine (pH 7.25) with a cOmplete™ protease inhibitor cocktail (Roche). The cells were ruptured by 10 Dounce homogenizer strokes using pestle A (large clearance) for the initial strokes, followed by pestle B using a pre-chilled Dounce homogenizer (abcam) for 25 strokes. The homogenized samples were centrifuged at 1,000×g for 10 min at 4°C. The supernatant was transferred to a new tube, and the mitochondrial pellet was collected after the centrifugation of the final supernatant at 11,500×g for 10 min at 4°C. Mitochondria were incubated in 20 mM KH<sub>2</sub>PO<sub>4</sub> buffer for 40 min in a cold room. After gentle agitation with a pipette, the samples were centrifuged at 4°C for 10 min at 8,000×g. The 100 µg of mitoplasts were resuspended in mitoplast swelling buffer containing 125 mM sucrose, 50 mM KCl, 5 mM HEPES, 2 mM KH<sub>2</sub>PO<sub>4</sub>, and 1 mM MgCl<sub>2</sub> (pH 7.2). The swelling reactions were energized with 20 mM succinate to support swelling using 0.1 mM H<sub>2</sub>O<sub>2</sub>, 600 µM Fe<sup>2+</sup>, and 250 µM Ca<sup>2+</sup> for 10 min at 28°C with or without pre-incubation with 1.6 µM CsA. In addition, 2 mM EDTA was added to prevent DNA degradation in the samples. After centrifugation, the mtDNA in the supernatant was purified using QIAamp DNA Micro Kit (Qiagen), and the mtDNA was detected using mouse mtDNA-specific primers.

## Sequencing of fimtDNA and cmtDNA

To prepare the fimtDNA for sequencing, we isolated pure mitochondria from MEFs without contamination from other organelles using the percoll gradient method (1). The fimtDNA was prepared by incubating the pure mitochondria in the CSK buffer for 5 min on ice, and cmtDNA

was prepared by incubating the MEFs in the digitonin buffer for 10 min. Purified fmitDNA and cmtDNA were used to construct NextGen sequencing libraries with ThruPLEX Plasma-seq Kit (Takara) following the manufacturer's instructions. Sequencing data were acquired using the Illumina MiSeq platform with a 2×75 bp modality. Raw sequence reads were first mapped to the GRCm38 mouse reference genome excluding the mitochondrial genome reference by Burrows-Wheeler Aligner (BWA) software (version 0.7.17) with default settings. In addition, the unmapped reads were saved and aligned to the GRCm38 mitochondrial genome by BWA with default settings. The SAMtools software (version 1.6) provided statistical information on the coverage of mtDNA and the insert size of the paired mapped reads. The insert size distribution was computed and plotted by the Kernel density estimation function in the R-stat package.

#### HSV-1 infection in MEFs

HSV-1 encoding mRFP fused to the N-terminus of VP26 (HSV-1-RFP; clone HSV F-GS 2822) was obtained from Dr. G.A. Smith at Northwestern University. The virus was titrated in both Vero cells and WT MEFs. HSV-1-RFP was added and incubated at 37°C with 5% CO<sub>2</sub> for 1–2 days until isolated plaques were formed. The red fluorescence intensity was determined using a UV fluorescence microscope (Olympus IX51) and flow cytometry (BD bioscience). To determine the HSV-1-RFP growth curve, *Vdac1/3*<sup>-/-</sup> MEFs with the respective WT counterparts were seeded in 12-well plates 1 d before infection and infected with HSV-1-RFP. Two aliquots of the input virus were stored as 0 h samples, and infected cell plates were incubated at 37°C with 5% CO<sub>2</sub> for 1 h. The inoculum was removed from the 12-well plates, and the plates were further cultured with fresh medium. At 3, 9, and 24 h post-infection, the infected MEFs were scraped in their culture supernatant and subjected to 3 cycles of freeze and thaw, followed by centrifugation

to remove cell debris. The cell-free virus in the supernatant was stored at  $-80^{\circ}\text{C}$  in a freezer and subsequently titrated in Vero cells by plaque assay (2).

#### mtDNA–VDAC1 binding assay

For the mtDNA–peptide binding assay, the C-terminal biotinylated peptide corresponding to a.a. residues 1–26 of mouse VDAC1 (MAVPPTYADLGKSARDVFTKGYGFGL) and the 3A mutant peptide (MAVPPTYADLGASAADVFTAGYGFGL) were synthesized with acetylation (N-terminus) and amidation (C-terminus) and purified by Genscript (Piscataway, NJ, USA). Mitochondrial DNA was amplified using PCR with a mtDNA specific primer from the D-loop region (Table. S1D). Purified mtDNA (120 bp) was incubated by rotating end-over-end with peptides and Streptavidin Dynabeads (Invitrogen) for 18 h at  $4^{\circ}\text{C}$ . The peptides were captured by the Streptavidin Dynabeads, and unbound peptides and free mtDNA were removed by extensive washing with PBS. The samples were treated with proteinase K for 30 min at  $60^{\circ}\text{C}$ , and the mtDNA in the supernatant was purified with QIAquick Nucleotide Removal Kit (Qiagen) and quantified using qPCR with the D-loop3 primers (Table. S1C). Interaction of VDAC1–mtDNA in the WT and *Endog*<sup>-/-</sup> MEFs was detected using an Immunoprecipitation Assay Kit (Millipore) following the manufacturer's instructions with anti-VDAC1 antibody (ab14734, abcam) or normal-mouse IgG (sc-2025, Santa Cruz) for negative control.

#### Mitochondrial and VDAC1 purification, channel reconstitution, recording and analysis

VDAC1 protein was purified from rat liver mitochondria using the celite:hydroxyapatite column followed by carboxy methy cellulose chromatography method as previously described (3). For conductance studies comparing WT and N-terminally (1–26 a.a.) truncated VDAC1 ( $\Delta\text{N-VDAC1}$ ), we purified WT and  $\Delta\text{N-VDAC1}$  from *VDAC1*-deficient HEK cells (by

CRISPR/Cas9 knockout method) transiently expressing the respective VDAC1. We transfected pcDNA4/TO plasmid (0.5 µg DNA) encoding for full-length murine *Vdac1* or ( $\Delta$ N-*Vdac1*) using calcium phosphate. 48 h post-transfection, cells were harvested and VDAC1 and  $\Delta$ N-VDAC1 were purified as described for liver mitochondria (3)

Purified murine WT VDAC1 or  $\Delta$ N-VDAC1 was reconstituted into a planar lipid bilayer (PLB). Subsequently, single and multiple channel current recordings and data analysis were carried out as previously described (4). Briefly, the PLB was prepared from soybean asolectin dissolved in n-decane (30 mg/ml). Purified VDAC1 was added to the chamber defined as the cis side containing 1 M NaCl, 10 mM HEPES, pH 7.4. Currents were recorded before and 15 min after the addition of 37 nM mtDNA (47 bp) in the cis or trans compartment, under voltage-clamp using a Bilayer Clamp BC-535B amplifier (Warner Instrument, Hamden, CT). The currents, measured with respect to the trans side of the membrane (ground), were low-pass-filtered at 1 kHz and digitized online using a Digidata1440-interface board and pClampex 10.2 software (Axon Instruments, Union City, CA).

#### Micro-scale thermophoresis analysis

Microscale thermophoresis (MST) analysis was performed using a NanoTemper Monolith NT.115 apparatus, as previously described (5). VDAC1 (162 nM) purified from rat liver was fluorescently labeled using NanoTemper fluorescent protein-labeling Kit BLUE (L001, NanoTemper Technologies, GmbH). A constant concentration of labeled VDAC1 was incubated with increasing concentrations of mtDNA (3.9–196 nM) or VBIT-4 (0.625–100 µM) in buffer. After 20 min of incubation, 3–5 µl of the samples were loaded into MST-grade glass capillaries (Monolith NT Capillaries), and the thermophoresis process was performed (LED 20%, IR laser

80%) using the Monolith-NT115 apparatus. The results are presented as the bound fraction calculated as follows:  $\text{fraction bound} = 100 \times (F - F_{\text{min}}) / (F_{\text{max}} - F_{\text{min}})$ .

#### mtDNA efflux from liposomes reconstituted with VDAC1

Liposomes were prepared by the extrusion method using a mini-extruder purchased from Avanti Polar Lipids Inc. (Alabaster, AL). Briefly, a thin lipid film was obtained by dissolving soybean asolectin (10 mg/ml of chloroform) and then evaporating chloroform slowly under a gentle stream of nitrogen gas. Next, the lipid film was hydrated in a buffer (10 mM Tricine, 150 mM NaCl, pH 7.4) containing 100 nM of mtDNA (47 bp) for 30–60 min at room temperature with five vortex cycles (1 min separated by 1 min of rest). Then, mtDNA was added to the suspension of large multilamellar vesicles, exposed to five freeze–thaw cycles using liquid nitrogen and passed 11 times through the mini-extruder containing a polycarbonate filter (Whatman) to obtain the mtDNA loaded-liposomes. mtDNA loaded-liposomes were equally divided into two aliquots for making VDAC1-containing and VDAC1-free liposomes. Incorporation of purified VDAC1 (30 µg/ml) into the mtDNA-loaded liposomes solution was performed by incubating the liposomes with VDAC1 for 20 min at room temperature, followed by three freeze–thaw cycles and mild sonication. VDAC1-free liposomes were similarly prepared by using VDAC1-column elution buffer instead of VDAC1. Samples were centrifuged for 15 min at 100,000×g and pellets were re-suspended in buffer (10 mM Tricine, 150 mM NaCl, pH 7.4). Liposomes were diluted fourfold and 40 min later, samples were centrifuged for 15 min at 100,000×g and supernatant aliquots were analyzed for mtDNA using qPCR with a mtDNA specific primer of the D-loop3 region (Table. S1C).

#### Mitochondrial swelling assay and $\text{Ca}^{2+}$ accumulation analysis

The mPTP opening was analyzed following mitochondria swelling. Briefly, freshly isolated mitochondria (0.5 mg/ml) were incubated for 2 min at 24°C with the indicated concentrations of VBIT-4 for the  $\text{Ca}^{2+}$ -induced mitochondrial swelling assay. Swelling was initiated by the addition of  $\text{Ca}^{2+}$  (0.1 mM) to the sample cuvette. Absorbance changes at 520 nm were monitored every 16 s for 15 min. Cyclosporine A (10  $\mu\text{M}$ ) was used as a positive control. Results are shown as a percentage of control.  $\text{Ca}^{2+}$  accumulation by freshly isolated rat liver mitochondria (0.5 mg/ml) was assayed with the indicated concentrations of VBIT-4 in the presence of 120 mM  $\text{CaCl}_2$  (containing [ $^{45}\text{Ca}^{2+}$ ]), 220 mM mannitol, 70 mM sucrose, 5 mM succinate, 0.15 mM Pi and 15 mM Tris/HCl, pH 7.2.  $\text{Ca}^{2+}$  uptake was terminated by rapid Millipore filtration (0.45  $\mu\text{m}$ ) followed by a wash with 5 ml of 0.15 M KCl. Results are shown as a percentage of control.

#### VDAC1 cross-linking assay

Purified VDAC1 (16  $\mu\text{g}/\text{ml}$ ) was incubated with 60 nM of mtDNA (120 bp) for 15 min at 25°C in 20 mM Tricine, pH 8.4 and then incubated for 15 min at 30°C with the cross-linking reagent EGS (100  $\mu\text{M}$ ). Samples were subjected to SDS-PAGE and immunoblotting using anti-VDAC1 antibody (ab154856, abcam). Quantitative analysis of immuno-reactive VDAC1 dimer, trimer and multimer bands was performed using FUSION-FX (Vilber Lourmat, France).

#### Caspase 3/7 activity and cell viability assay

Caspase activity was assayed using the Caspase-Glo 3/7 luminescent assay kit (Promega) or by immunoblotting as described previously. Cell viability was quantified by a sensitive colorimetric viability assay kit, CCK-8 (Dojindo). The luminescent and absorbance were measured using a microplate reader Cytation 3 (BioTek). For live/dead cell staining, cells were stained with 2  $\mu\text{M}$  calcein AM (Green) for live cell staining and 4  $\mu\text{M}$  Ethidium homodimer-1, EthD-1 (Red)

for dead-cell staining. The stained cells were observed using a LSM880 confocal microscope (Zeiss) equipped with a 63×/1.4 Plan-Apochromat lens (Zeiss).

#### Animal model of SLE

All experiments were approved by the ACUC (Animal Care and Use Committee) of the NIH/NHLBI. Female MRL/MpJ-*Fas<sup>lpr</sup>*/J mice (stock #000485) were used as a model to determine the etiology of systemic lupus erythematosus (SLE). MRL/MpJ mice (stock #000486) were used as a control for MRL/MpJ-*Fas<sup>lpr</sup>*/J mice. All mice were purchased from The Jackson Laboratory. VBIT-4 was freshly dissolved in DMSO and diluted in water (final pH 5.0, DMSO 0.05%). The MRL/MpJ-*Fas<sup>lpr</sup>*/J mice were treated with a daily freshly diluted dose of VBIT-4 (20 mg/kg) or vehicle water (final pH 5.0, DMSO 0.05%) in drinking water for 5 w, beginning at 11 w of age until euthanasia at 16 w of age. Blood and urine samples were collected when the mice were 16 w of age. Body weight were measured before and after VBIT-4 administration (11 and 16 w of age respectively). Skin, kidney, thymus, and lymph nodes were also collected.

#### Albumin:creatinine ratio in the urine

Urinary albumin and creatinine were measured after VBIT-4 administration (16 w of age) using ELISA kits (Exocell) following the manufacturer's instructions to determine the albumin:creatinine ratio.

#### Quantification of mtDNA, anti-dsDNA antibodies, anti-nuclear antigen (ANA), and IgG in the serum of animal model of lupus

Circulating mtDNA was isolated from 500 µl of the experimental mouse serum collected at 16 w of age by using the QIAamp Circulating Nucleic Acid Kit (Qiagen) according to the

manufacturer's protocol. In brief, serum samples were incubated with proteinase K and carrier RNA at 55°C for 30 min in lysis buffer, and the circulating nucleic acids were bound to the silica membrane by applying vacuum pressure. After washing, the eluted samples were used for qPCR. Primers from the mtDNA D-loop region were used to quantify serum mtDNA (Table S1C). Anti-dsDNA antibodies were detected in the serum using an ELISA kit (Alpha Diagnostic). ANA were detected using an ANA ELISA Kit (Alpha Diagnostic), and IgG were detected using a total-IgG ELISA Kit (Invitrogen) following the manufacturer's instructions.

#### Immune complex deposition in kidney glomeruli

Kidneys were harvested from MpJ-*Fas<sup>lpr</sup>* mice. Frozen kidney sections were fixed in cold acetone for 20 min, washed, and blocked for 18 h at 4°C with 4% BSA in PBS. To detect glomerular deposits, the sections were stained with FITC-conjugated anti-mouse C3 antibody (GC3-90F-Z, Immunology Consultants Laboratory) and Alexa Fluor 594-conjugated anti-Mouse IgG antibody (A-11020, Invitrogen) with 1 µg/ml of Hoechst 33342 (Life Technologies) staining for 1 h at room temperature. After washing with PBS, the tissues were mounted, and the slides were observed using a LSM880 confocal microscope (Zeiss). The fluorescence intensity score was determined after analyzing random images for each animal in a blinded manner.

#### Human samples and study approval

Heparinized venous peripheral blood was obtained from SLE subjects or from healthy controls enrolled at the Clinical Center, National Institutes of Health. All individuals signed an informed consent form following IRB-approved protocols (NIH 94-AR-0066). SLE subjects fulfilled the revised American College of Rheumatology diagnostic criteria (6). Disease activity

was determined using the SLEDAI-2K criteria (7). Individuals with recent or active infections were excluded.

#### Isolation of normal-density granulocytes and low-density granulocytes

Human normal-density granulocytes (NDGs) were isolated from heparinized venous blood using a Ficoll-Paque gradient (GE Healthcare) with dextran (Sigma-Aldrich) sedimentation, followed by red blood cell lysis using hypotonic NaCl as described previously (8). LDGs were isolated from the PBMC layer using a negative-selection method as described previously (8).

#### Visualization and quantification of Neutrophil extracellular traps

Neutrophil extracellular traps (NETs) were induced in NDGs by incubating human granulocytes with the calcium ionophore A23187 (25  $\mu$ M) (Thermo Fisher) in RPMI 1640 medium for 2 h. NETs were then quantified as previously described (9) using SYTOX fluorescent dye at 485/520 nm to quantify extracellular DNA. The fluorescence of PicoGreen (Life Technologies) at  $t = 0$  min was measured at 485/520 nm (emission/extinction) to quantify the total DNA. The fluorescence was quantified using a microplate reader Synergy HTX (BIOTEK). NETs were also quantified by fluorescence microscopy as previously described (9). In brief, the cells were attached to coverslip chambers, stimulated for 90 min at 37°C with A23187 (25  $\mu$ M), fixed with 4% paraformaldehyde overnight at 4°C, and permeabilized with 0.2% Triton X-100 for 10 min, followed by 0.5% gelatin for 20 min. The cells were stained with primary antibodies against human neutrophil elastase (ab21595, abcam) for 2 h at room temperature, washed in PBS, and stained with 1  $\mu$ g/ml of Hoechst 33342 (Life Technologies) and Alexa Fluor 488-conjugated secondary antibody (A31570, Life Technologies) against the primary antibodies for 2 h at room temperature.

After mounting, the cells were visualized with a LSM880 confocal microscope (Zeiss) equipped with a 63×/1.4 Plan-Apochromat lens (Zeiss).

#### Statistical analyses

Statistical comparisons between groups were performed by two-tailed unpaired Student's *t*-test and ANOVA with Tukey's post-hoc test for multiple comparisons using GraphPad Prism7 software (GraphPad). For the statistical analyses of human samples, the sample size was determined using similar patient numbers per experimental condition. The normality distribution of the sample sets was determined by the d'Agostino and Pearson omnibus normality test. For sample sets with a Gaussian distribution, Student's two-tailed *t*-test, paired *t*-test, or Pearson's correlation coefficient analysis was performed. For the limited number of sample sets with a non-Gaussian distribution, the Mann–Whitney *U* test was performed as applicable. Multiple comparisons with the same group in more than one analysis were adjusted using the Bonferroni correction. All values are presented as the mean ± SEM of at least three independent experiments, and differences were considered statistically significant at  $p < 0.05$ .

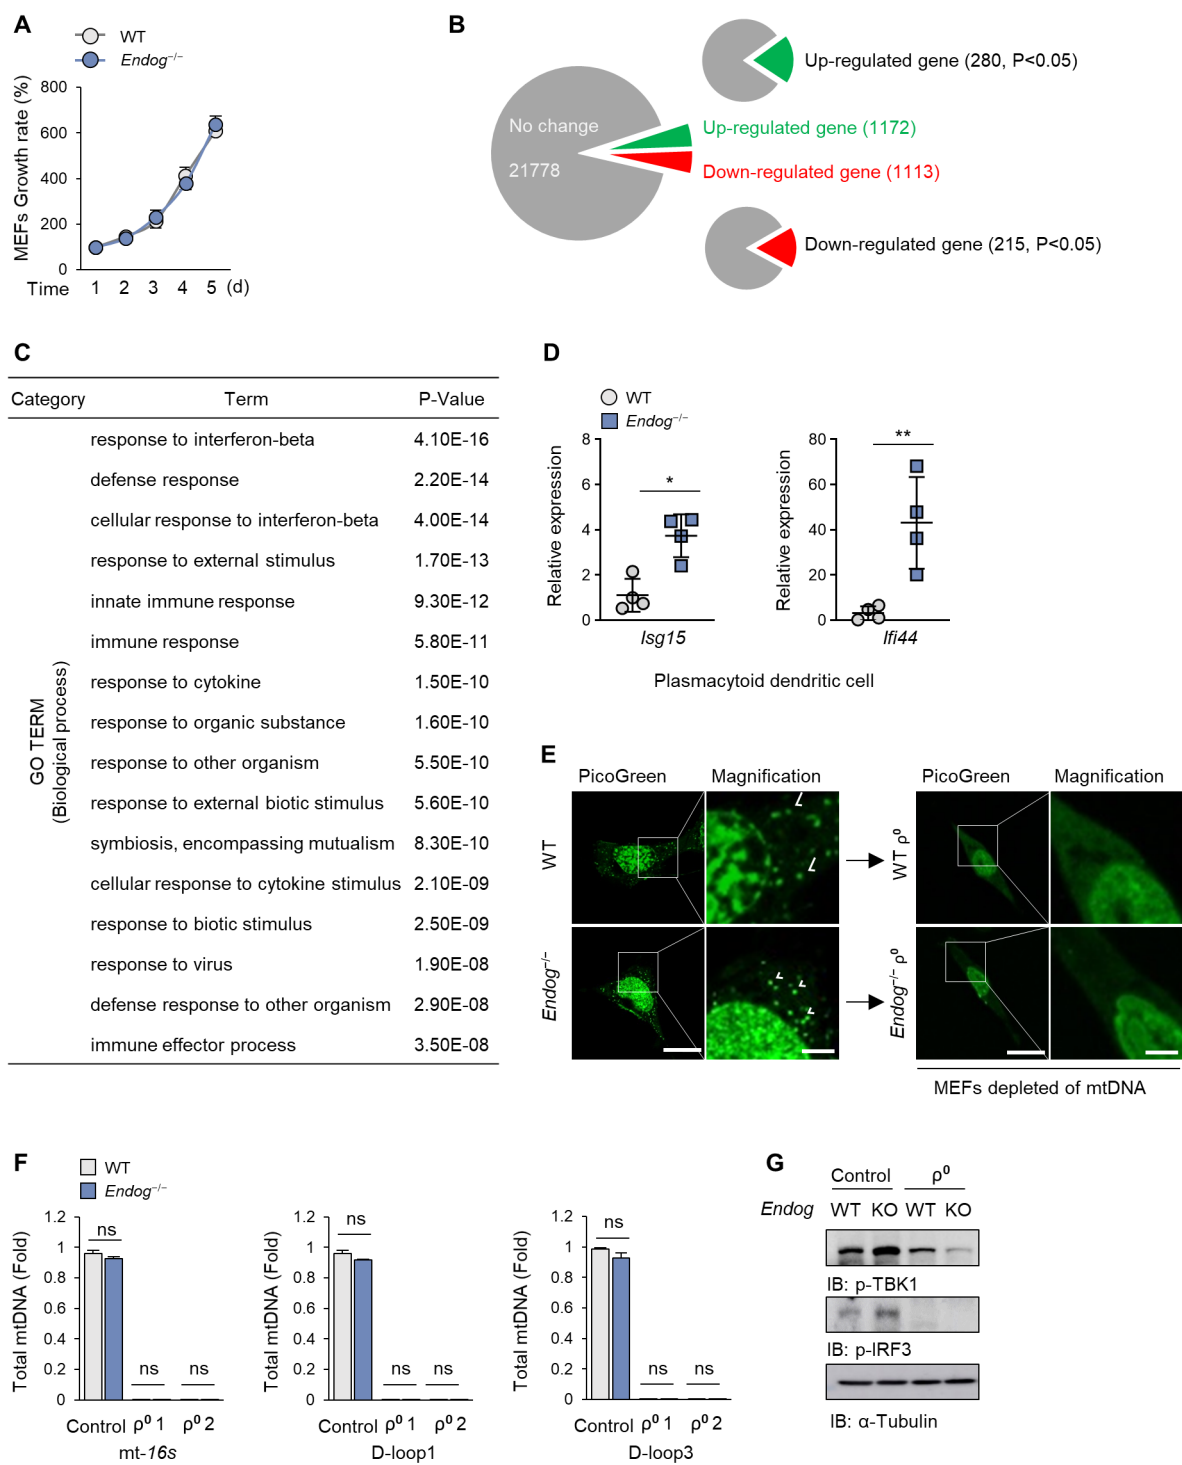

**Fig. S1. Interferon response in *Endog*<sup>-/-</sup> MEFs.** (A) cell growth rate in WT and *Endog*<sup>-/-</sup> MEFs. (B) ISG expression levels in WT and *Endog*<sup>-/-</sup> plasmacytoid dendritic cells. (C and D) RNAseq

analysis in WT and *Endog*<sup>-/-</sup> MEFs. Schematic pie charts indicate statistically upregulated and downregulated genes in *Endog*<sup>-/-</sup> versus WT MEFs (C). Gene ontology analysis of upregulated genes (D). (E and F) WT and *Endog*<sup>-/-</sup> ρ<sup>0</sup> MEFs were devoid of mtDNA. Nuclear and mitochondrial DNA in MEFs were stained by PicoGreen, and white arrowheads indicate mtDNA. Scale bar, 40 μm; magnification, 10 μm. (E). Total mtDNA levels in WT and *Endog*<sup>-/-</sup> MEFs as well as two independently-generated ρ<sup>0</sup> MEFs (ρ<sup>0</sup> 1 and ρ<sup>0</sup> 2), from both WT and *Endog*<sup>-/-</sup> MEFs (F). (G) Phosphorylation of TBK and IRF3 was visualized in ρ<sup>0</sup> MEFs derived from WT and *Endog*<sup>-/-</sup> MEFs and their controls by immunoblotting. All values are presented as the mean ± SEM of at least three independent experiments. \*p < 0.05; \*\*p < 0.01; ns, not significant.

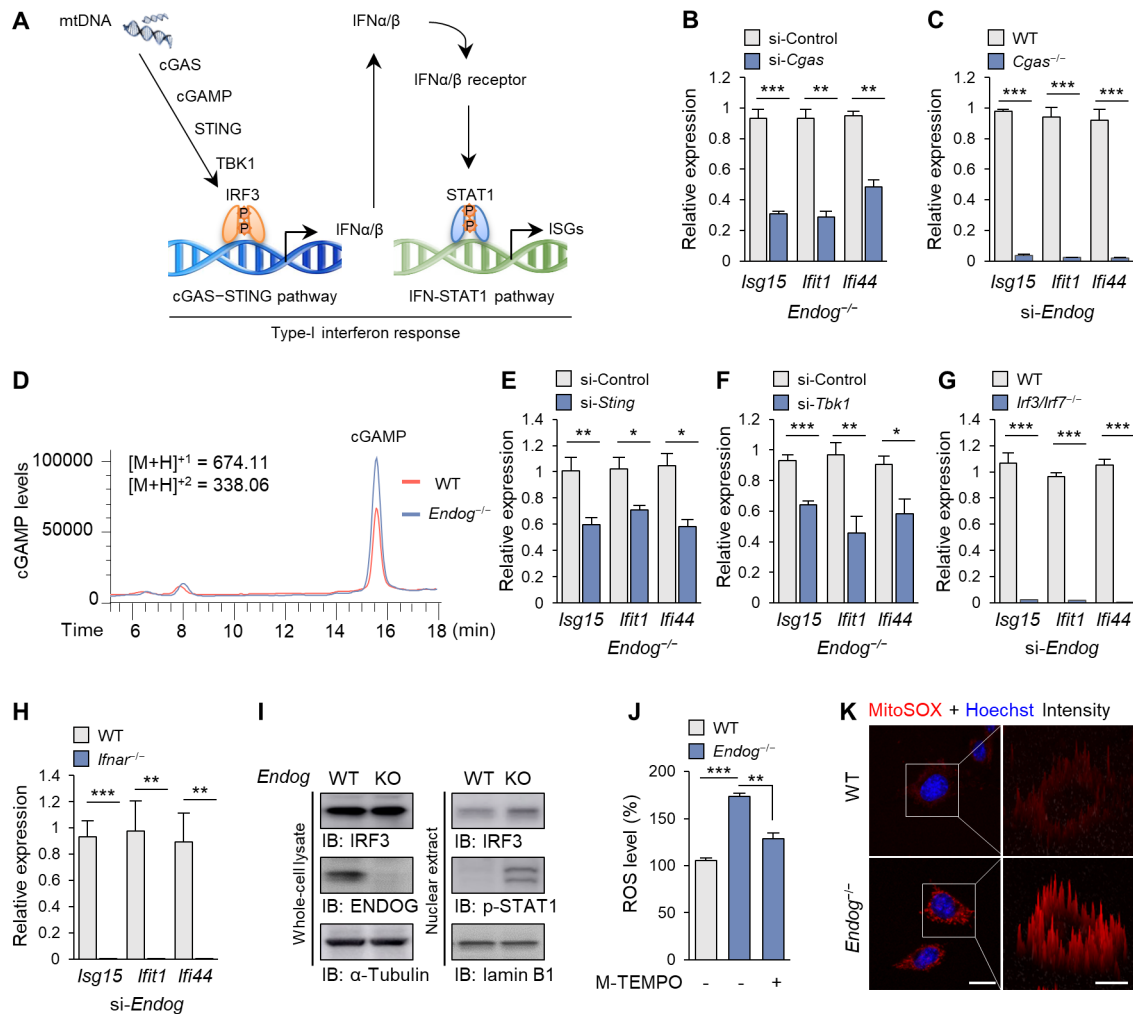

**Fig. S2. ROS-mediated cmtDNA activates the cGAS-STING pathway.** (A) Schematic diagram of the cGAS-STING cytosolic DNA sensing pathway and the IFN/STAT1 pathway for ISG expression. cGAS, which generates the cyclic dinucleotide cGAMP upon binding to cytosolic DNA, is a key effector of the type-I IFN response. (B to G) The cGAS-STING pathway in *Endog*<sup>-/-</sup> MEFs. *Endog*<sup>-/-</sup> MEFs transfected with siRNA for *Cgas* (B) and *Endog* siRNA was transfected into *Cgas*<sup>-/-</sup> MEFs (C). Intracellular levels of cGAMP were determined by LC/MS in WT and *Endog*<sup>-/-</sup> MEFs (D). *Endog*<sup>-/-</sup> MEFs transfected with siRNA for *Sting* (E), or *Tbk1* (F), *Endog* siRNA was transfected into *Irf3/Irf7*<sup>-/-</sup> MEFs (G). (H and I) IFN/STAT1 pathway in *Endog*<sup>-/-</sup> MEFs. *Endog* siRNA was transfected into *Ifnar*<sup>-/-</sup> MEFs (H). WT and *Endog*<sup>-/-</sup> MEFs

were fractionated and whole-cell lysate and nuclear extract were subjected to immunoblotting, using the indicated antibodies (I). (J) mROS levels were measured in WT and *Endog*<sup>-/-</sup> MEFs after treatment with Mito(M)-TEMPO (10  $\mu$ M) for 48 h. (K) Confocal microscopy images of MitoSOX (mitochondria) and Hoechst (Nucleus). Scale bar, 20  $\mu$ m; magnification, 10  $\mu$ m. All values are presented as the mean  $\pm$  SEM of at least three independent experiments. \*p < 0.05; \*\*p < 0.01; \*\*\*p < 0.005.

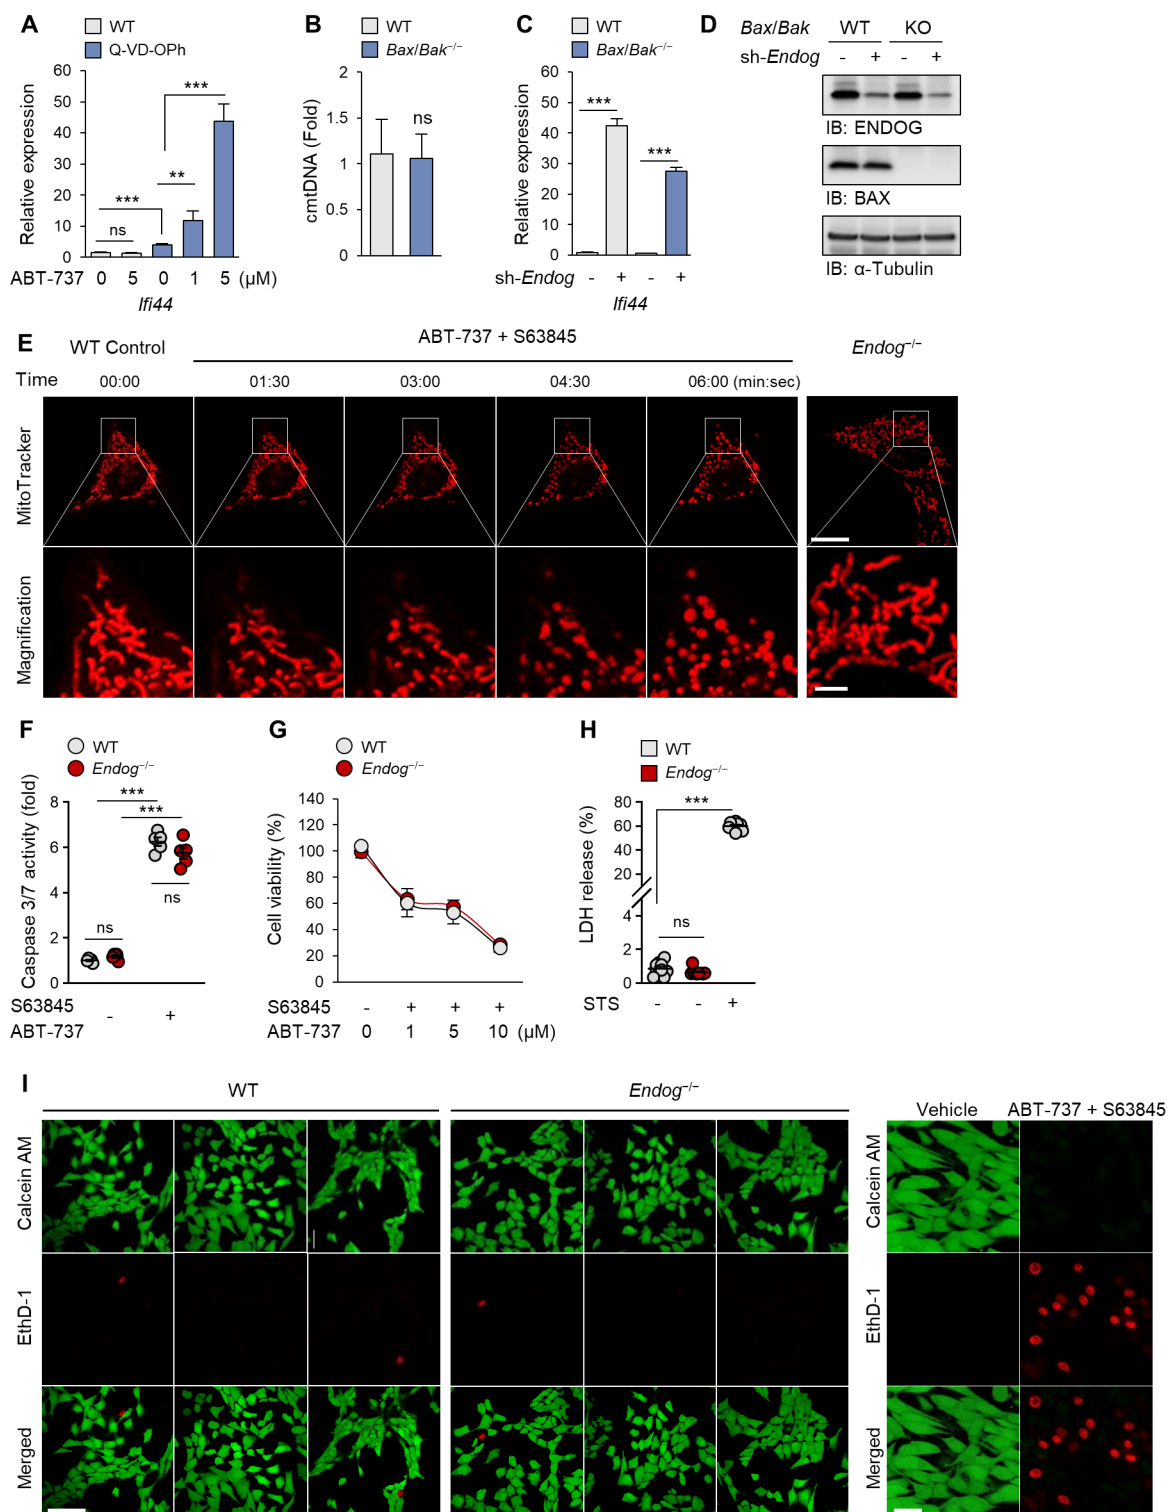

**Fig. S3. *Endog*-deficiency does not increase apoptosis.** (A) The ISG expression level was measured in WT MEFs after activation of BAX/BAK with the BCL-2 inhibitor ABT-737 in the presence of the caspase inhibitor Q-VD-OPh (10  $\mu$ M). Q-VD-OPh was used because apoptotic caspases suppress mtDNA-induced ISG expression. (B) cmtDNA levels in WT and *Bax/Bak*<sup>-/-</sup> MEFs. (C and D) ISG expression levels were measured after knocking down *Endog* in WT and *Bax/Bak*<sup>-/-</sup> MEFs by RT-qPCR (C). Expressed levels of ENDOG and BAX are shown by immunoblotting (D). (E) Time lapse image of WT mitochondrial morphology after induction of apoptosis with a combination of ABT-737 (10  $\mu$ M) and the MCL-1 inhibitor S63845 (5  $\mu$ M) in the presence of the caspase inhibitor Q-VD-OPH (10  $\mu$ M), and mitochondrial morphology of *Endog*<sup>-/-</sup> MEFs. Scale bar, 20  $\mu$ m; magnification, 5  $\mu$ m. (F and G) Caspase 3/7 activity of WT and *Endog*<sup>-/-</sup> MEFs treated with ABT-737 (10  $\mu$ M) and S63845 (5  $\mu$ M) for 4 h (F) and Viability of MEFs for 24 h (G). (H) LDH release in WT and *Endog*<sup>-/-</sup> MEF. Treatment with apoptosis inducer staurosporin (STS) (2  $\mu$ M) was used as a positive control for LDH release. (I) Viability of WT and *Endog*<sup>-/-</sup> MEFs by live (calcein-AM) or dead (ethidium homodimer-1, EthD-1) staining. Scale bar, 100  $\mu$ m. (left). Treatment with ABT-737 (10  $\mu$ M) and S63845 (5  $\mu$ M) were used as a positive control for apoptosis. Scale bar, 20  $\mu$ m. (right). All values are presented as the mean  $\pm$  SEM of at least three independent experiments. \*\*p < 0.01; \*\*\*p < 0.005; ns, not significant.

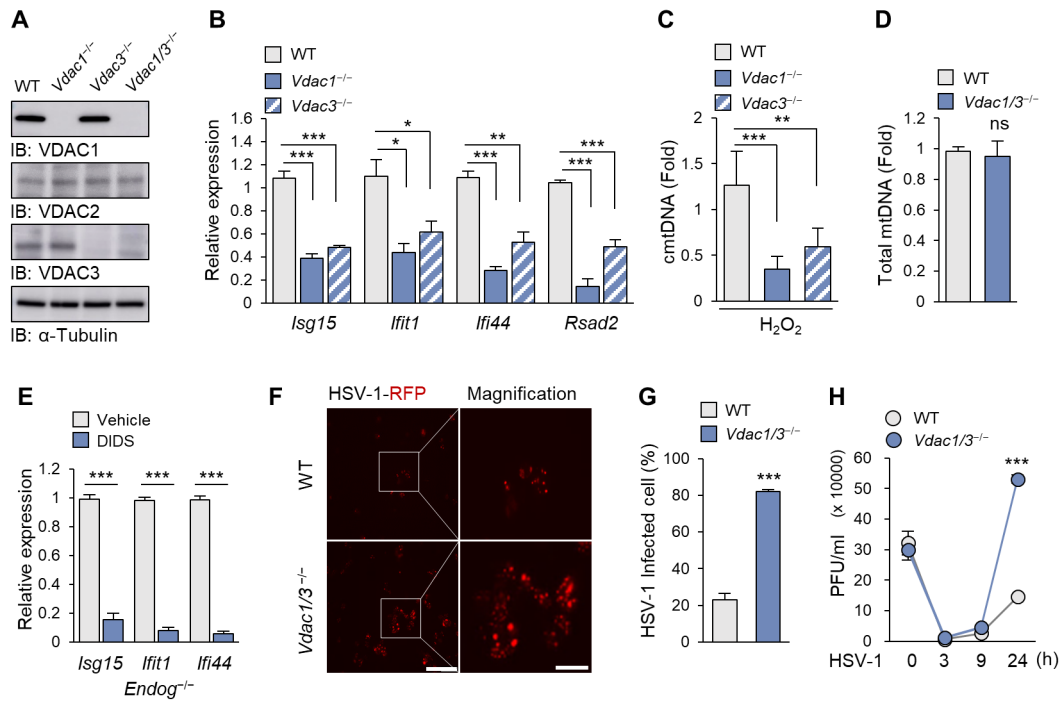

**Fig. S4. The roles of VDAC in the type-I interferon response.** (A) Expression level of VDAC isoforms in *Vdac1*<sup>-/-</sup>, *Vdac3*<sup>-/-</sup> and *Vdac1/3*<sup>-/-</sup> MEFs were visualized by immunoblotting. (B to D) ISG expression levels (B), cmtDNA levels (C), and total mtDNA levels (D) were measured by RT-qPCR. (E) ISG expression levels were determined after treatment with 4,4'-diisothiocyanostilbene-2,2'-disulfonic acid (DIDS) (100 μM) for 24 h in *Endog*<sup>-/-</sup> MEFs by RT-qPCR. (F to H) HSV-1-red fluorescent protein (RFP) infection in WT and *Vdac1/3*<sup>-/-</sup> MEFs (MOI=0.1). Scale bar, 100 μm; magnification, 30 μm. (F). Percentage of RFP positive cells were determined by flow cytometry (G). The replication kinetics of HSV-1-RFP was determined by measuring the virus growth curve. Virus titers were then determined in Vero cells (H). All values are presented as the mean ± SEM of at least three independent experiments. \*p < 0.05; \*\*p < 0.01; \*\*\*p < 0.005; ns, not significant.

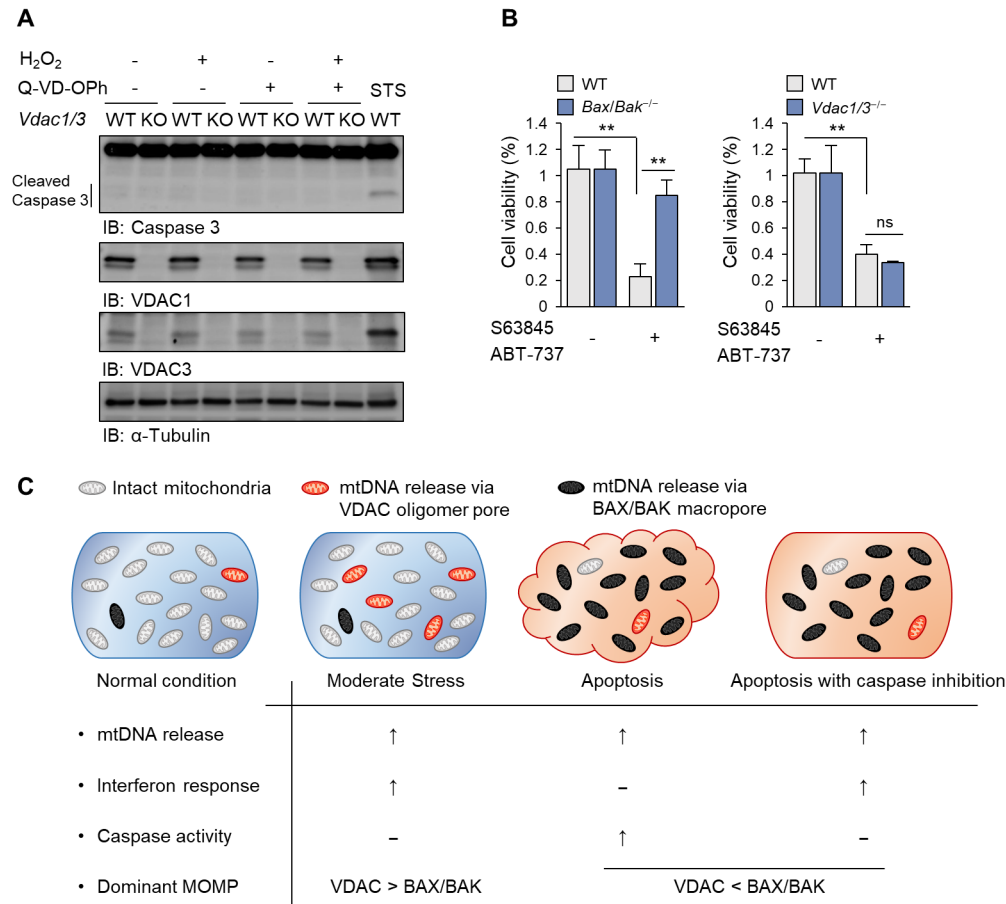

**Fig. S5. The roles of VDAC on apoptosis.** (A) Caspase 3 cleavage in WT and *Vdac1/3*<sup>-/-</sup> MEFs after treatment with or without H<sub>2</sub>O<sub>2</sub> (100 μM) and/or Q-VD-OPh (10 μM) for 24 h was visualized by immunoblotting. STS (2 μM) was used as a positive control for caspase 3 cleavage. (B) Viability of WT, *Bax/Bak*<sup>-/-</sup> and *Vdac1/3*<sup>-/-</sup> MEFs treated with ABT-737 (10 μM) and S63845 (5 μM) for 24 h. (C) Schematic diagram of mtDNA release, interferon response, and caspase activity in stressed conditions in comparison to normal conditions. All values are presented as the mean ± SEM of at least three independent experiments. \*\*p < 0.01; ns, not significant.

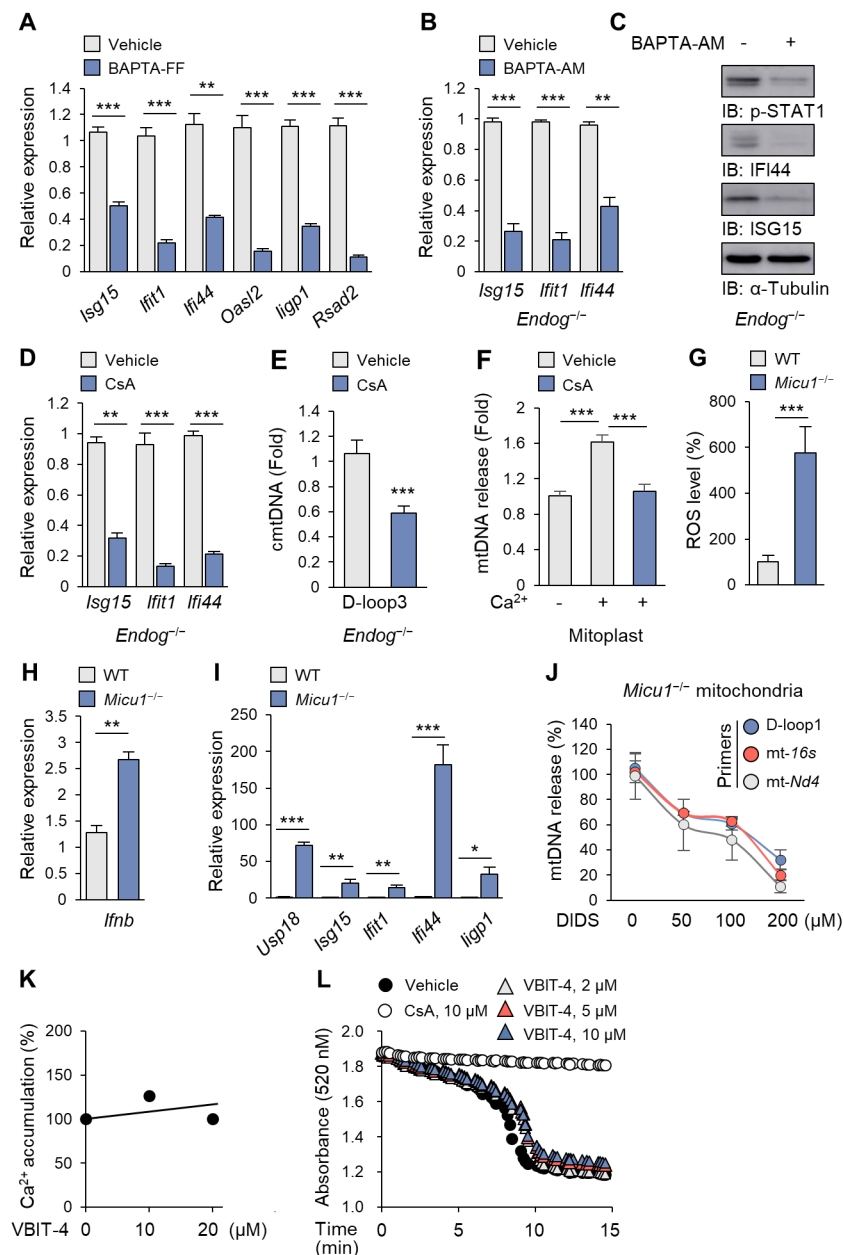

**Fig. S6. The role of Ca<sup>2+</sup> and mPTP in mtDNA release in live cells.** (A to C) ISG expression levels were measured in *Endog*<sup>-/-</sup> MEFs after treatment with the calcium chelators BAPTA-FF (15 μM) (A) and BAPTA-AM (20 μM) (B) by RT-qPCR and immunoblot (C). (D) ISG expression levels were measured in *Endog*<sup>-/-</sup> MEFs after treatment with Cyclosporine A (CsA). (E) cmtDNA levels were measured after treatment with CsA. (F) Levels of released mtDNA

446 were measured in mitoplasts after treatment with  $\text{Ca}^{2+}$  and CsA. (G) ROS levels were detected  
447 by using the CM- $\text{H}_2\text{DCFDA}$  probe in WT and *Micu1*<sup>-/-</sup> MEFs. (H and I) *Ifnb* (H) and ISG (I)  
448 expression levels were evaluated in WT and *Micu1*<sup>-/-</sup> MEFs. (J) The effect of VDAC inhibitor  
449 DIDS on mtDNA released from isolated mitochondria from *Micu1*<sup>-/-</sup> MEFs during incubation in  
450 a buffer without  $\text{Ca}^{2+}$  (qPCR was performed using the three indicated primers). (K) Effect of  
451 VBIT-4 on  $\text{Ca}^{2+}$  accumulation in freshly isolated mitochondria. (L)  $\text{Ca}^{2+}$ -induced mitochondrial  
452 swelling was assayed in freshly prepared mitochondria in the presence of varying concentrations  
453 of VBIT-4. All values are presented as the mean  $\pm$  SEM of at least three independent  
454 experiments. \* $p < 0.05$ ; \*\* $p < 0.01$ ; \*\*\* $p < 0.005$ .

455

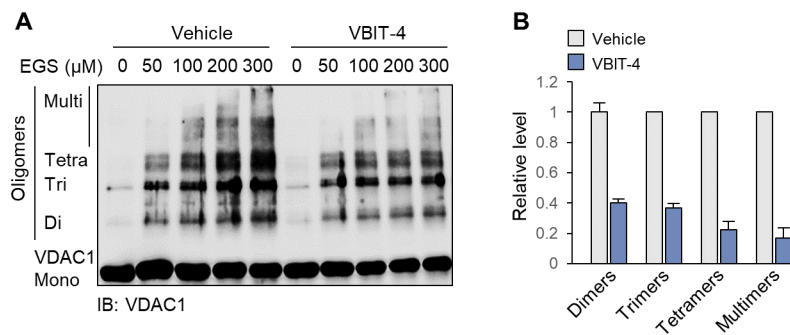

**Fig. S7. VDAC1 oligomerization in liposomes.** (A) The effect of VBIT-4 on VDAC1 oligomerization in liposome. Purified rat liver VDAC1 was reconstituted into liposomes as in Fig. 2F and incubated with or without VBIT-4 (20 μM) for 30 min. VDAC1 was then crosslinked using the indicated concentrations of EGS before immunoblotting. The positions of VDAC1 monomers (Mono), dimers (Di), trimers (Tri), tetramers (Tetra) and multimers (Multi) are indicated. (B) Quantification of VDAC1 oligomers shown in (A).

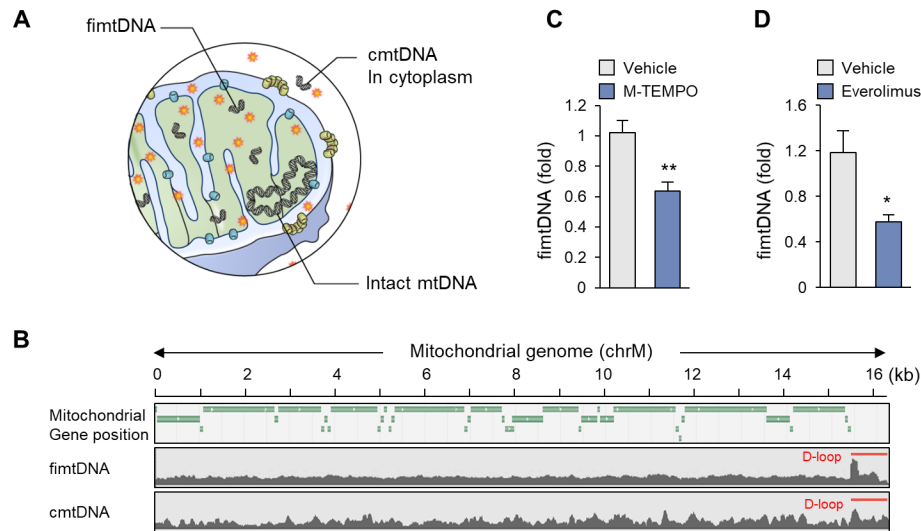

**Fig. S8. The distribution of fimtDNA and cmtDNA fragments.** (A) Schematic diagram of mitochondria containing intact mtDNA, fimtDNA, and cmtDNA. (B) The distribution of fimtDNA and cmtDNA fragments that were visualized by Integrated Genome Browser. The results shown are the average of three samples. Green boxes indicate mitochondrial gene positions, and red lines indicate the D-loop region. (C and D) qPCR analysis of the fimtDNA by treatment with 10  $\mu$ M Mito-TEMPO (C) and 100 nM mTORC1 inhibitor everolimus (D) for 48 h. All values are presented as the mean  $\pm$  SEM of at least three independent experiments. \* $p$  < 0.05; \*\* $p$  < 0.01.

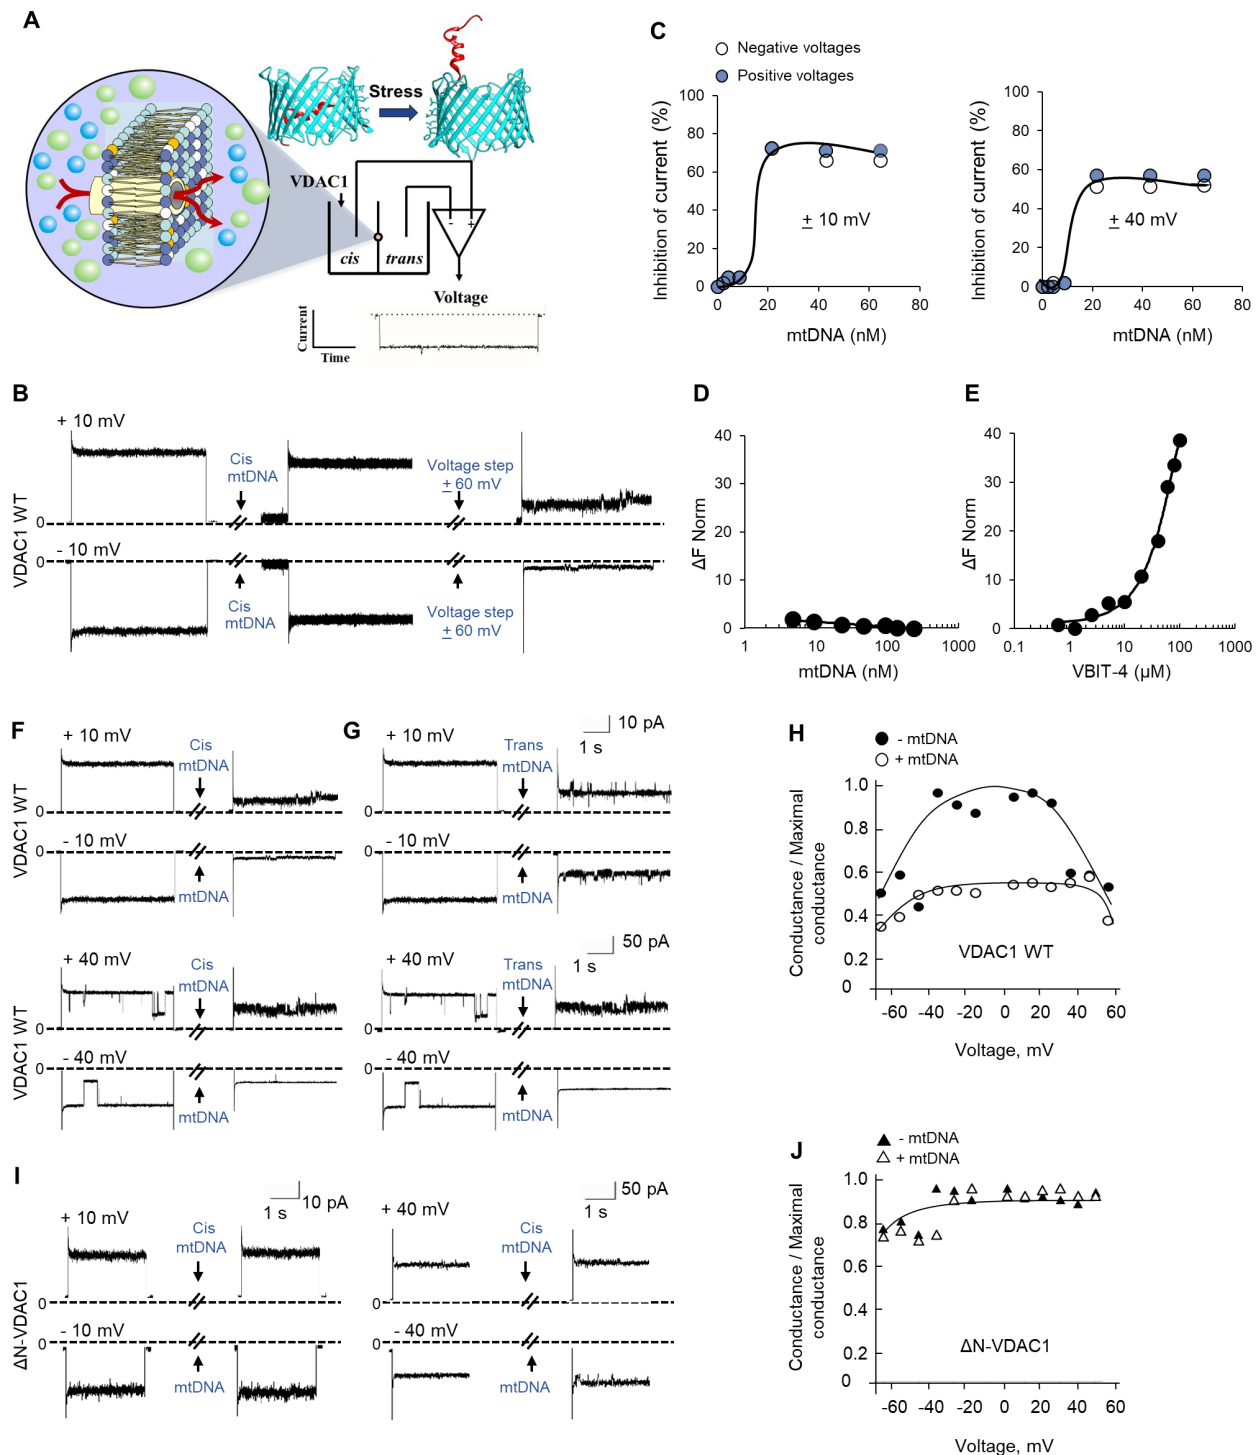

**Fig. S9. The effects of mtDNA on VDAC1 and  $\Delta$ N-VDAC1 conductance.** (A) Schematic diagram of channel conductance properties assay by reconstitution of VDAC1 into a planar lipid bilayer (PLB). VDAC1 is composed of 19 transmembrane  $\beta$ -strands forming a membrane-

477 embedded  $\beta$ -barrel and a flexible amphipathic 26-residue-long N-terminal domain that lies inside  
478 the channel but can translocate from within the channel to the pore surface when VDAC1  
479 oligomerizes. As mtDNA fragments pass through the VDAC1 oligomer pores, direct mtDNA–  
480 VDAC1 interaction may occur. In order to test this, purified mitochondrial VDAC1 was  
481 reconstituted into PLB and the effect of mtDNA fragments on channel conductance under voltage-  
482 clamp conditions was measured. **(B)** Single channel current through VDAC1 was recorded in  
483 response to voltage steps 0 to 10 mV or –10 mV. Next, mtDNA was added to the cis side of the  
484 PLB and channel conductance was recorded 2–5 min following mtDNA addition. After about 20  
485 min, the channel was exposed to a high voltage step and current through the channel was recorded  
486 at  $\pm 10$  mV. The dashed lines indicate the zero-level current. mtDNA inhibited VDAC1  
487 conductance, but it required pre-exposure of the PLB-reconstituted channel to a high voltage (60  
488 mV). Evidence suggests that high voltage exposes the VDAC1 N-terminal domain by inducing its  
489 translocation out of the VDAC1 potentially allowing its interaction with mtDNA. **(C)**  
490 Concentration-dependent inhibition of VDAC1 channel conductance by mtDNA (the cis  
491 compartment) at  $\pm 10$  mV and  $\pm 40$  mV. **(D and E)** Analysis of mtDNA (D) or VBIT-4 (E)  
492 interaction with VDAC1 using micro-scale thermophoresis, which cannot be performed with prior-  
493 exposure to high voltage for technical reasons, revealed no interaction of mtDNA with VDAC1,  
494 whereas VBIT-4 did show interaction with VDAC1. **(F and G)** Effect of mtDNA on the  
495 conductance of VDAC1. Inhibition of PLB-reconstituted VDAC1 conductance by mtDNA is  
496 shown before and after the addition of mtDNA in the cis; cytoplasm facing side (F) or trans;  
497 intermembrane space side (G) compartment at  $\pm 10$  mV and  $\pm 40$  mV. Samples were pre-exposed  
498 to 60 mV before the conductance measurement. **(H)** Effect of mtDNA on VDAC1 channel  
499 conductance as a function of voltage, from 60 mV to –60 mV. **(I and J)** Effect of mtDNA on  
500 channel conductance of PLB-reconstituted  $\Delta$ N-VDAC1. Channel conductance was measured

501 before and after the addition of mtDNA in the cis compartment at  $\pm 10$  mV and  $\pm 40$  mV. Samples  
502 were pre-exposed to 60 mV before the conductance measurement. Effects of mtDNA on  $\Delta N$ -  
503 VDAC1 relative conductance as a function of voltage, from 60 mV to  $-60$  mV (J). Relative  
504 conductance (conductance/maximal conductance) was determined as the average steady-state  
505 conductance at a given voltage normalized to the conductance at 10 mV, maximal conductance.  
506

**A**

| Peptide sequence alignment          | Species    |                   |
|-------------------------------------|------------|-------------------|
| MAVPPTYADLGK <b>S</b> ARDVFTKGYGFGL | Human      | Homo sapiens      |
| MAVPPTYADLGK <b>S</b> ARDVFTKGYGFGL | Mouse      | Mus musculus      |
| MAVPPTYADLGK <b>S</b> ARDVFTKGYGFGL | Rat        | Rattus norvegicus |
| MAVPPTYADLGK <b>S</b> ARDVFTKGYGFGL | Monkey     | Macaca mulatta    |
| MAVPPTYADLGK <b>S</b> ARDVFTKGYGFGL | Chimpanzee | Pan troglodytes   |
| MAVPPTYADLGK <b>S</b> ARDVFTKGYGFGL | Sheep      | Ovis aries        |

**B**

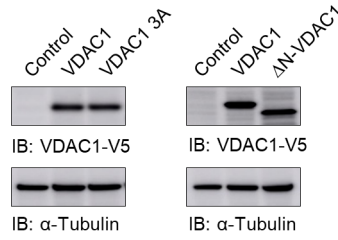

**C**

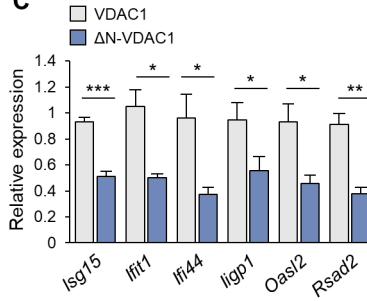

**Fig. S10. The function of VDAC1 N-terminal region in type-I IFN response.** (A) Phylogenetic analysis of VDAC1 N-terminal region. (B) VDAC1 and VDAC1 mutant expression levels by immunoblotting. (C) ISG expression levels were measured by RT-qPCR in WT and ΔN-VDAC1 expressing MEFs after treatment with H<sub>2</sub>O<sub>2</sub> (100 μM) for 18 h. All values are presented as the mean ± SEM of at least three independent experiments. \*p < 0.05; \*\*p < 0.01; \*\*\*p < 0.005.

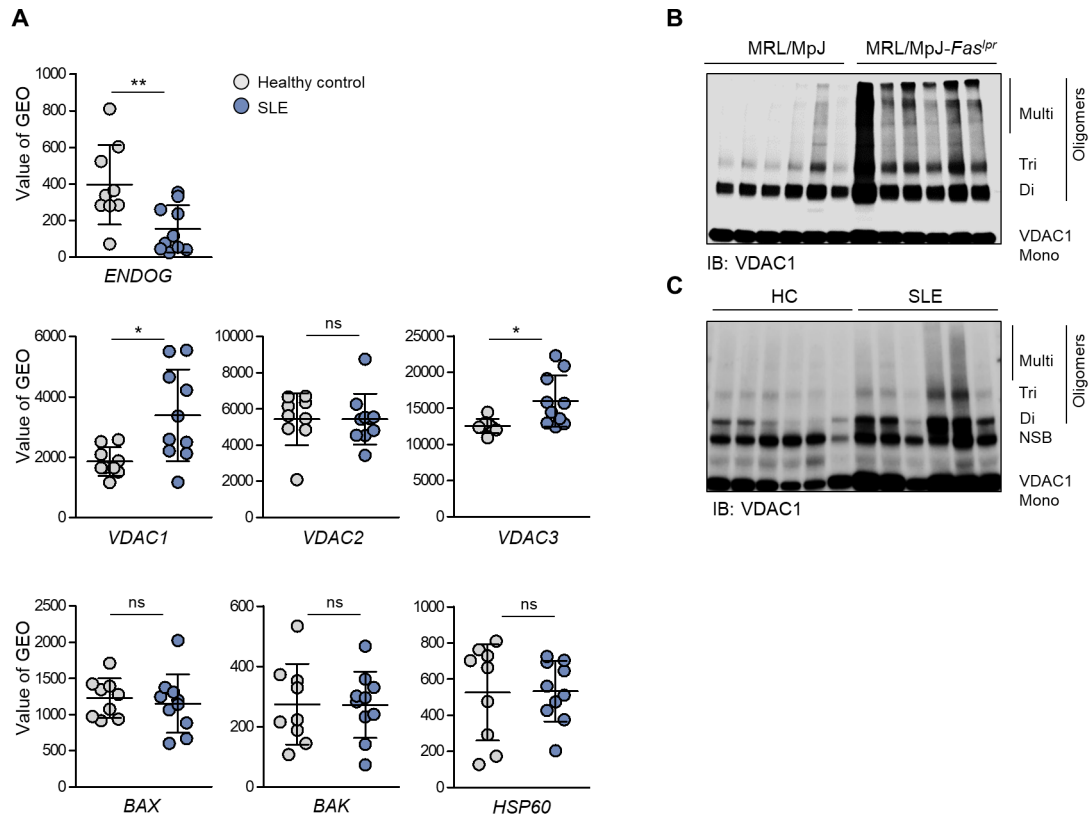

**Fig. S11. The expression and oligomerization of VDAC1 in lupus-like disease.** (A) Analysis of gene expression levels from healthy control and SLE (Lupus) patients. Raw data were obtained from GEO accession no. GSE13887. (B and C) VDAC1 oligomerization in mouse splenocytes (B) and human PBMC (C) was visualized by immunoblotting (n=6 individuals). NSB, non-specific band.

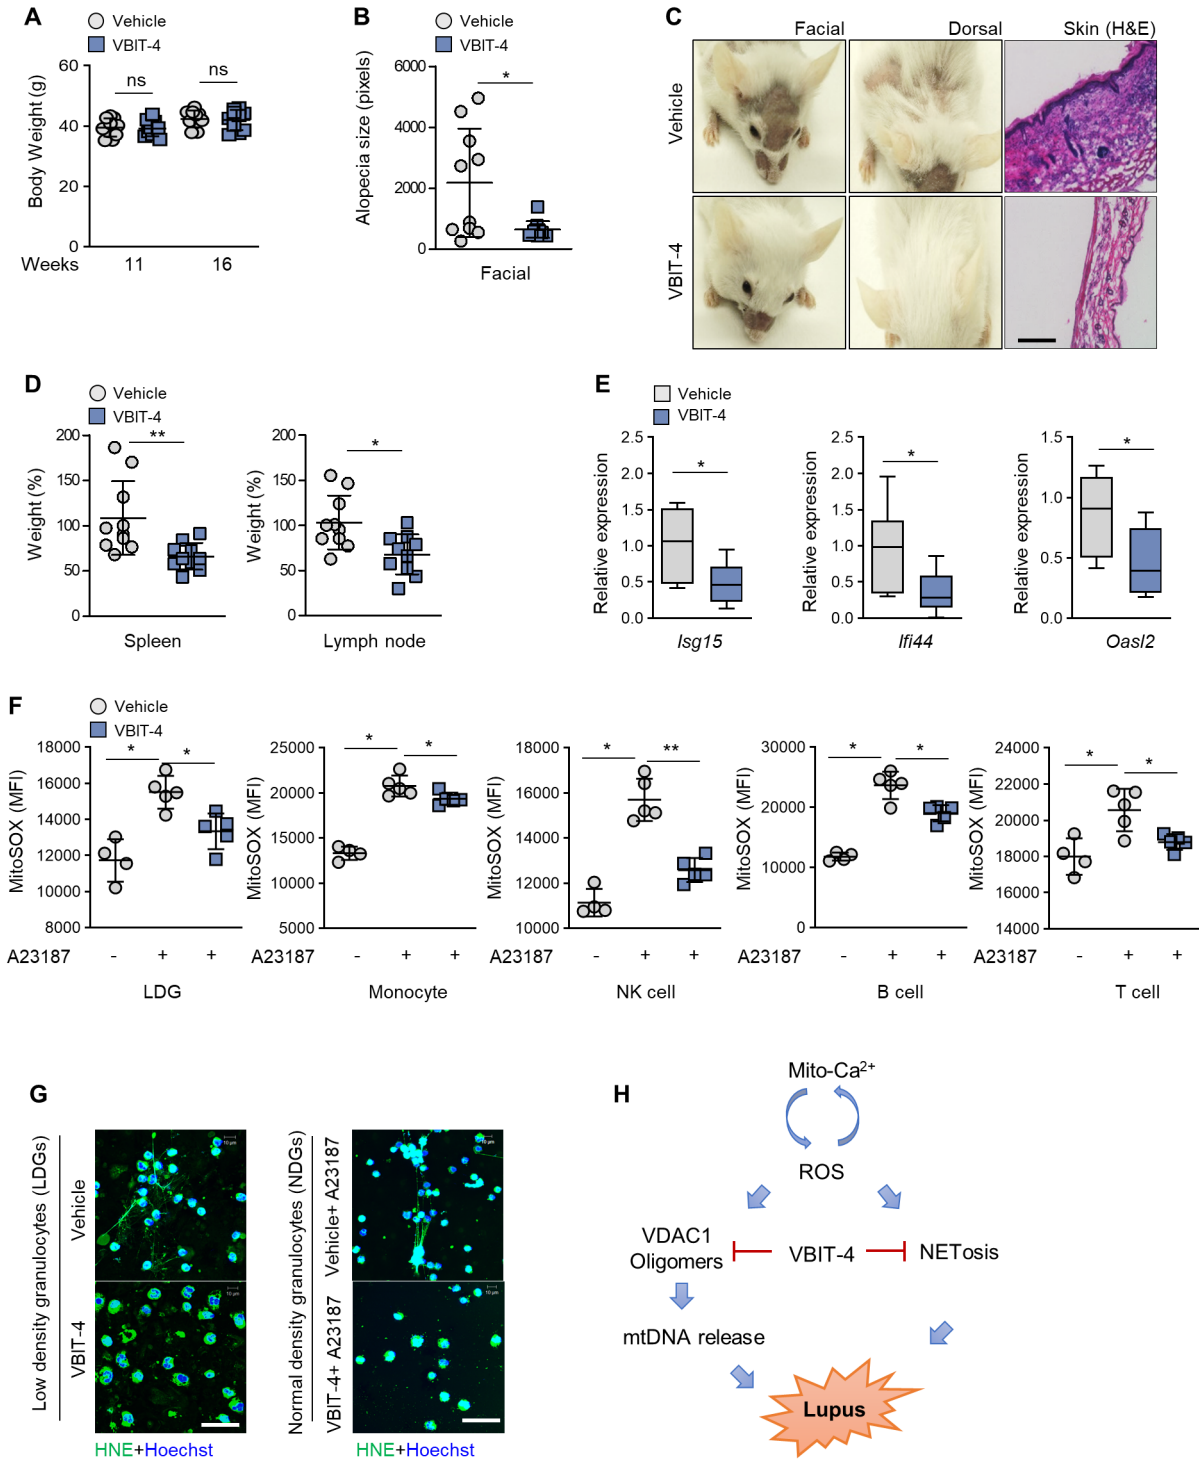

**Fig. S12. The role of VDAC1 oligomerization in lupus-like disease.** (A) Body Weight of vehicle and VBIT-4 treated mice (MpJ-*Fas<sup>lpr</sup>*), at 11 and 16 weeks of age (n=10 in each group). (B and C)

Alopecia in the facial and dorsal areas and erythema in the skin lesions (H&E) of VBIT-4-treated MpJ-*Fas<sup>lpr</sup>* mice. Quantification of alopecia of the mice (n=10 in each group). **(D)** Weight of the spleen and lymph nodes of treated mice (n=10 in each group). **(E)** Expression of ISG in the spleen of treated mice. (n=6 in each group). **(F)** mROS level was measured by flow cytometry in several cell types after treatment with A23187 and VBIT-4. **(G)** Inhibition of spontaneous NET formation of low-density granulocytes (LDGs, SLE) by VBIT-4. Scale bar, 40  $\mu$ m (left). Inhibition of A23187-stimulated NET formation of normal-density granulocytes (NDGs, SLE) by VBIT-4. Scale bar, 40  $\mu$ m (right). Green represents human neutrophil elastase (HNE), and blue represents DNA (Hoechst). **(H)** Schematic diagram of development of lupus-like disease by VDAC1. VBIT-4, which inhibits VDAC1 oligomerization, decreases mtDNA release, type-I IFN signaling, neutrophil extracellular traps (NETs) and disease severity in SLE. All values are presented as the mean  $\pm$  SEM. \* $p < 0.05$ ; \*\* $p < 0.01$ ; ns, not significant.

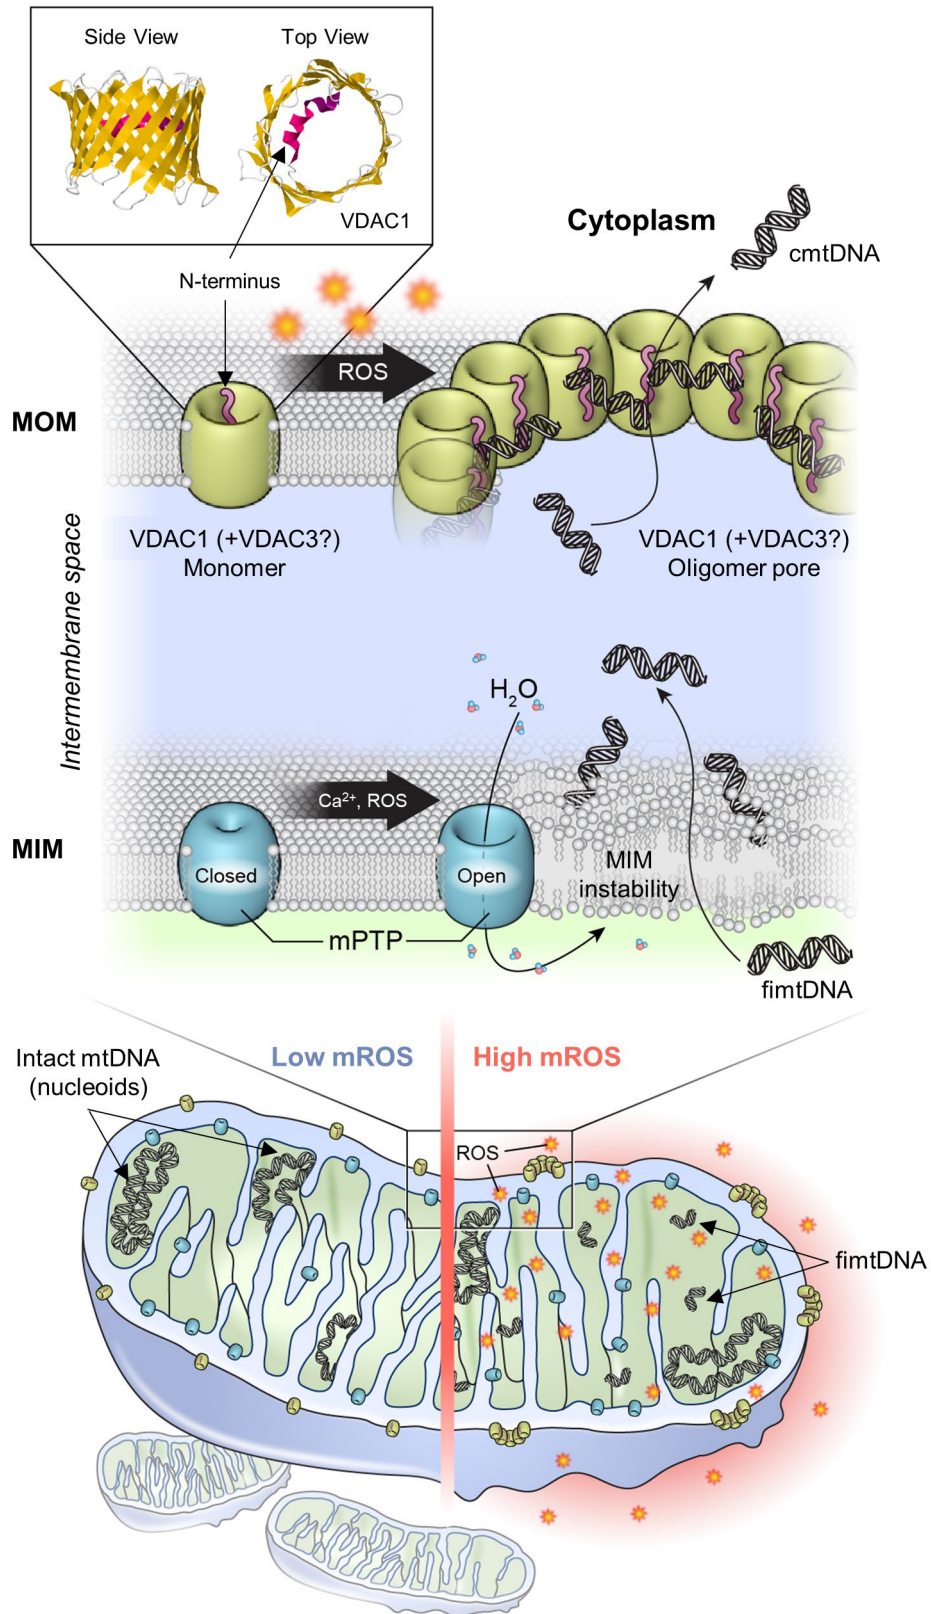

**Fig. S13. Schematic diagram of mtDNA release and development of lupus-like disease.** The MOMP created by mROS-induced oligomerization of VDAC1, and possibly VDAC3, releases mtDNA into the cytosol. The highly dynamic N-terminal domain of VDAC translocates out of the channel when VDAC is in an oligomerized state. Unlike the lipophilic  $\beta$ -barrel of VDAC1, the N-terminal  $\alpha$ -helix domain is hydrophilic which generates a hydrophilic surface in the oligomer pore and facilitates the passage of mtDNA across the MOM. In our model, the negatively charged backbones of mtDNA fragments interact with the positively charged residues of the VDAC1 N-terminal domain and act as a scaffold to stabilize VDAC1 oligomers. The opening of mPTP in the subpopulation of stressed mitochondria damages MIM, allowing mtDNA to pass through. The mPTP opening is dependent on  $\text{Ca}^{2+}$ -influx but not on VDAC1 oligomerization. Although VDAC3 is not amenable for in vitro studies because it tends to form aggregations in vitro, it has similar positively-charged residues in its N-terminal domain, overall structure and binding affinity to VBIT-4 (10) as VDAC1, suggesting that it may form oligomer pores in a manner similar to VDAC1.

**Table S1. Primers and oligos sequence used in this study.**

**A. Primers sequence for VDAC1 mutation.**

| Name                   | Forward Primer                                                 | Reverse Primer                                                |
|------------------------|----------------------------------------------------------------|---------------------------------------------------------------|
| ΔN-VDAC1               | 5'-AACGGATCCATGATAAACTTGATTTGAA<br>AAC-3'                      | 5'-AAGCTCGAGTGCTTGAAATTCAGTCCTA<br>G-3'                       |
| VDAC1 alanine mutation | 5'-GCCGATCTTGGCGCGTCCGCCGCGGAT<br>GTCTTCACCGCGGGCTACGGCTTTG-3' | 5'-CAAAGCCGTAGCCCGCGGTGAAGACAT<br>CCGCGCGGACGCGCCAAGATCGGC-3' |

**B. Primers sequence of RT-qPCR for mRNA expression**

| Gene Name     | Forward Primer                    | Reverse Primer               |
|---------------|-----------------------------------|------------------------------|
| <i>Cxcl10</i> | 5'-CCAAGTGCTGCCGTCATTTTC-3'       | 5'-GGCTCGCAGGGATGATTTCAA-3'  |
| <i>Endog</i>  | 5'-ACCAGAATGCCTGGAACAAC-3'        | 5'-ATCAGCACCTTGAAGAAGTG-3'   |
| <i>Gapdh</i>  | 5'-GACTTCAACAGCAACTCCAC-3'        | 5'-TCCACCACCCTGTTGCTGTA-3'   |
| <i>Ifi44</i>  | 5'-CTGATTACAAAAGAAGACATGACAGAC-3' | 5'-AGGCAAAACCAAGACTCCA-3'    |
| <i>Ifit1</i>  | 5'-CAAGGCAGGTTTCTGAGGAG-3'        | 5'-GACCTGGTCACCATCAGCAT-3'   |
| <i>Ifit3</i>  | 5'-TTCCCAGCAGCACAGAAAC-3'         | 5'-AAATTCCAGGTGAAATGGCA-3'   |
| <i>Ifna4</i>  | 5'-CTTTCCTCATGATCCTGGTAATGAT-3'   | 5'-AATCCAAAATCCTTCTGTCTTC-3' |
| <i>Ifnb</i>   | 5'-CCCTATGGAGATGACGGAGA-3'        | 5'-CCCAGTGCTGGAGAAATTGT-3'   |
| <i>Ilgp1</i>  | 5'-CTATGACTTCCCCGTCGTA-3'         | 5'-TCAGAAATTGCCGCTTCTTT-3'   |
| <i>Isg15</i>  | 5'-CTAGAGCTAGAGCCTGCAG-3'         | 5'-AGTTAGTCACGGACACCAG-3'    |
| <i>Oasl2</i>  | 5'-GGATGCCTGGGAGAGAATCG-3'        | 5'-TCGCCTGCTCTTCGAAACTG-3'   |
| <i>Rsad2</i>  | 5'-ACACAGCCAAGACATCCTTC-3'        | 5'-CAAGTATTCACCCCTGTCTG-3'   |
| <i>Usp18</i>  | 5'-GAGAGGACCATGAAGAGGA-3'         | 5'-TAAACCAACCAGACCATGAG-3'   |
| <i>Vdac1</i>  | 5'-ACTAATGTGAATGACGGGACA-3'       | 5'-GCATTGACGTTCTTGCCAT-3'    |

**C. Primers sequence of qPCR**

| Name    | Forward Primer                | Reverse Primer                 |
|---------|-------------------------------|--------------------------------|
| D-loop1 | 5'-AATCTACCATCCTCCGTGAAACC-3' | 5'-TCAGTTTAGCTACCCCCAAGTTAA-3' |
| D-loop2 | 5'-CCCTTCCCATTTGGTCT-3'       | 5'-TGGTTTCACGGAGGATGG-3'       |
| D-loop3 | 5'-TCCTCCGTGAAACCAACAA-3'     | 5'-AGCGAGAAGAGGGGCATT-3'       |
| mt-16s  | 5'-CACTGCCTGCCAGTGA-3'        | 5'-ATACCGCGGCCGTTAA-3'         |
| mt-Nd4  | 5'-AACGGATCCACAGCCGTA-3'      | 5'-AGTCCTCGGGCCATGATT-3'       |

**D. Oligos sequence for mtDNA amplification**

| Name         | Forward Primer                                                                                                                           | Reverse Primer                                                                                                                              |
|--------------|------------------------------------------------------------------------------------------------------------------------------------------|---------------------------------------------------------------------------------------------------------------------------------------------|
| mtDNA 47 bp  | 5'-TCCTCCGTGAAACCAACAACCCGCC<br>ACCAATGCCCTCTTCTCGCT-3'                                                                                  | 5'-AGCGAGAAGAGGGGCATTGGTGGCG<br>GGTTGTTGTTTCACGGAGGA-3'                                                                                     |
| mtDNA 120 bp | 5'-TCCTCCGTGAAACCAACAACCCGCCA<br>CCAATGCCCTCTTCTCGCTCCGGGCC<br>CATTAACTTGGGGGTAGCTAACTGA<br>AACTTATCAGACATCTGTTCTTACTTC<br>AGGGCCATCA-3' | 5'-TGATGGCCCTGAAGTAAGAACCAGATG<br>TCTGATAAAGTTTCAGTTTAGCTACCCCC<br>AAGTTTAATGGGCCCGAGCGAGAAGA<br>GGGGCATTGGTGGCGGGTTGTTGTTT<br>CACGGAGGA-3' |

553

554 **Table. S1. Primers and oligos sequence used in this study. (A)** Primers sequence for alanine

555 mutation of the VDAC1 N-terminal domain. **(B)** Primers sequence used in RT-qPCR for mRNA

556 expression. **(C)** Primers sequence for qPCR. **(D)** Oligos sequence for mtDNA amplification.

## References and Notes

1. M. R. Wieckowski, C. Giorgi, M. Lebieczinska, J. Duszynski, P. Pinton, Isolation of mitochondria-associated membranes and mitochondria from animal tissues and cells. *Nat Protoc* **4**, 1582-1590 (2009).
2. K. Wang *et al.*, A Herpes Simplex Virus 2 (HSV-2) gD Mutant Impaired for Neural Tropism Is Superior to an HSV-2 gD Subunit Vaccine To Protect Animals from Challenge with HSV-2. *J Virol* **90**, 562-574 (2016).
3. N. Keinan, H. Pahima, D. Ben-Hail, V. Shoshan-Barmatz, The role of calcium in VDAC1 oligomerization and mitochondria-mediated apoptosis. *Biochim Biophys Acta* **1833**, 1745-1754 (2013).
4. D. Ben-Hail, V. Shoshan-Barmatz, Reconstitution of purified VDAC1 into a lipid bilayer and recording of channel conductance. *Cold Spring Harb Protoc* **2014**, 100-105 (2014).
5. C. J. Wienken, P. Baaske, U. Rothbauer, D. Braun, S. Duhr, Protein-binding assays in biological liquids using microscale thermophoresis. *Nat Commun* **1**, 100 (2010).
6. M. C. Hochberg, Updating the American College of Rheumatology revised criteria for the classification of systemic lupus erythematosus. *Arthritis Rheum* **40**, 1725 (1997).
7. D. D. Gladman, D. Ibanez, M. B. Urowitz, Systemic lupus erythematosus disease activity index 2000. *J Rheumatol* **29**, 288-291 (2002).
8. M. F. Denny *et al.*, A distinct subset of proinflammatory neutrophils isolated from patients with systemic lupus erythematosus induces vascular damage and synthesizes type I IFNs. *J Immunol* **184**, 3284-3297 (2010).

- 578 9. C. Lood *et al.*, Neutrophil extracellular traps enriched in oxidized mitochondrial DNA are  
579 interferogenic and contribute to lupus-like disease. *Nat Med* **22**, 146-153 (2016).
- 580 10. D. Ben-Hail *et al.*, Novel Compounds Targeting the Mitochondrial Protein VDAC1 Inhibit  
581 Apoptosis and Protect against Mitochondrial Dysfunction. *J Biol Chem* **291**, 24986-25003  
582 (2016).  
583
